# Supplementary material for: Controllable preparation of sea urchin-like Au NPs as a SERS substrate for highly sensitive detection of the toxic atropine
Source: Royal Society of Chemistry journal article supplement (doi:10.1039/d1ra03223b), 2021-01-01

## Controllable preparation of sea urchin-like Au NPs as SERS substrate for highly sensitive detection of the toxic atropine

Yazhou Qin,<sup>a</sup> Yuanzhao Wu,<sup>a</sup> Binjie Wang<sup>a</sup> Jiye Wang,<sup>a</sup> Xingsen Zong<sup>a</sup> and Weixuan Yao<sup>\*a</sup>

a. a. Key Laboratory of Drug Prevention and Control Technology of Zhejiang Province Zhejiang Police College, 555 Binwen Road, Binjiang District, Hangzhou 310053, Zhejiang Province, P. R. China.

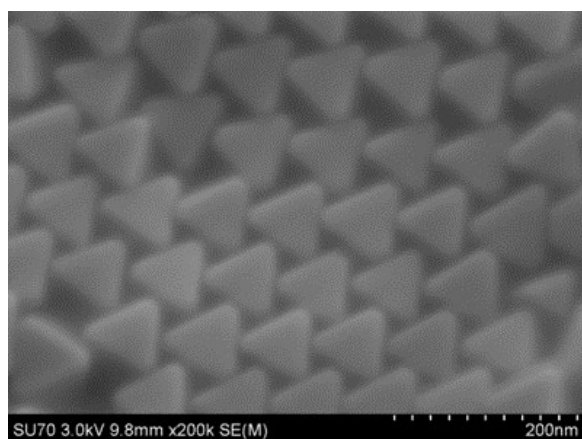

Fig. S1 SEM image of octahedron gold crystal.

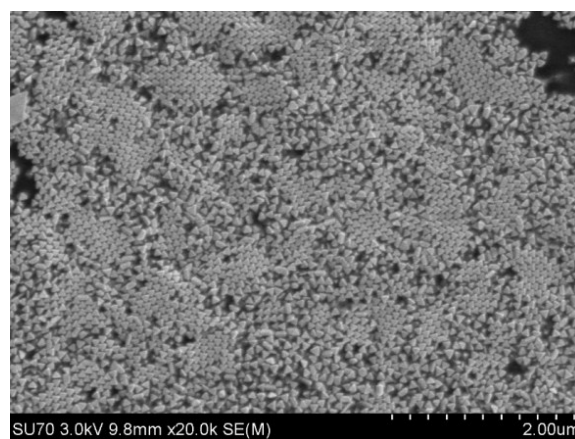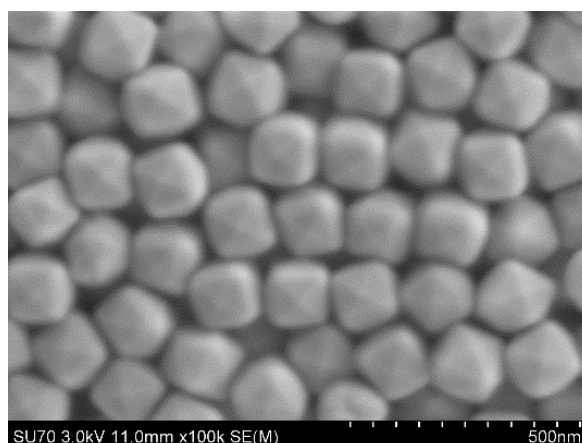

Fig. S2 SEM image of THH gold crystal.

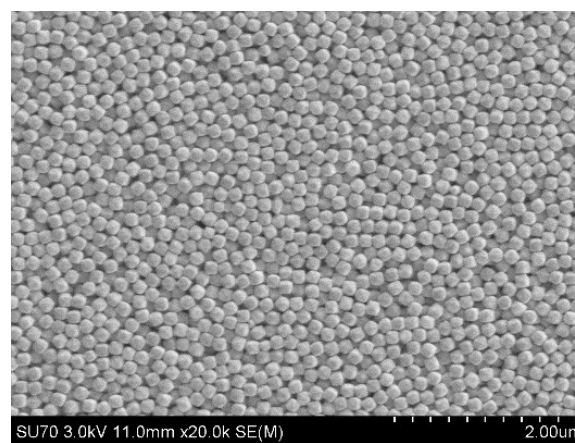

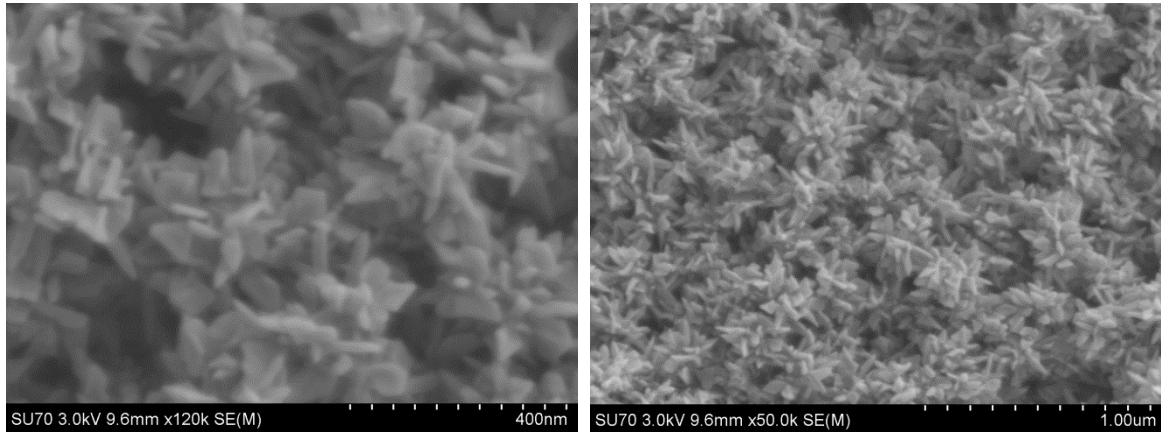

Figure S3 the SEM image of sea urchin-like gold nanoparticles prepared when 200  $\mu\text{L}$  of gold octahedral seeds and 300  $\mu\text{L}$  of 2 mM glutathione are added.

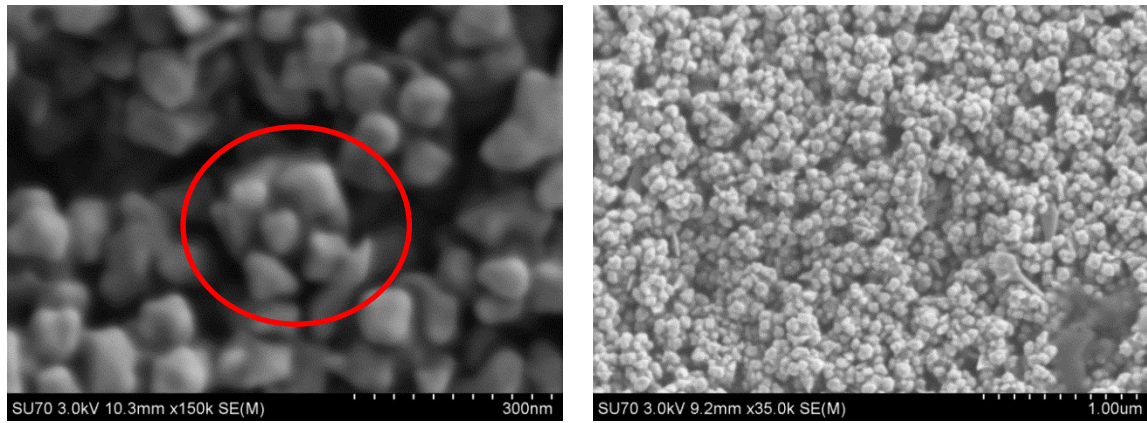

Fig.S4 SEM images of gold nanostructures prepared with 10  $\mu\text{L}$  glutathione in the growth solution.

Fig.S5 SEM images of gold nanostructures prepared with 25  $\mu\text{L}$  glutathione in the growth solution.

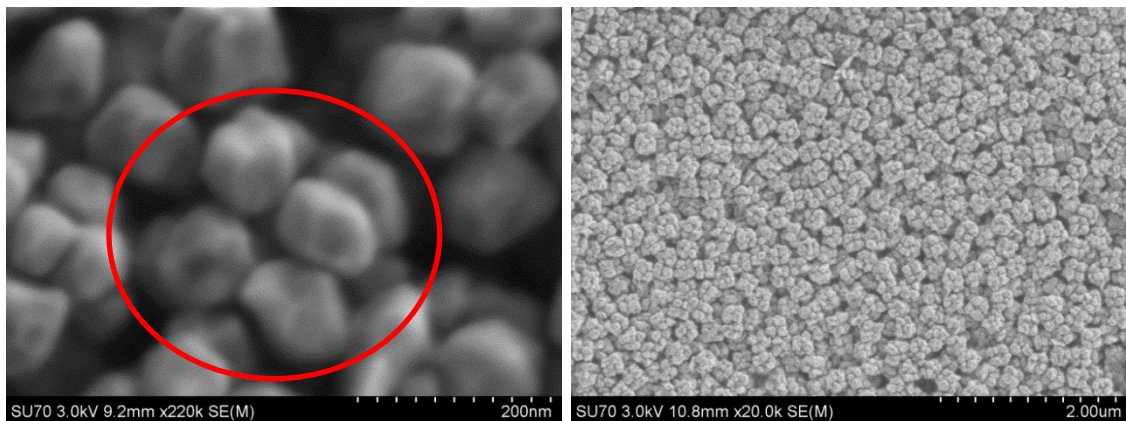

Supplement: d1ra03223b1.pdf [file d1ra03223b1.pdf]
